# Supplementary material
Source: PubMed Central journal article supplement (PMC6751783)
Supplement: jamacardiol-4-1112-s001.pdf [file jamacardiol-4-1112-s001.pdf]

## Supplementary Online Content

Huston JH, Maron BA, French J, et al. Association of mild echocardiographic pulmonary hypertension with mortality and right ventricular function. *JAMA Cardiol*. Published online September 18, 2019. doi:10.1001/jamacardio.2019.3345

### **eMethods.**

**eTable 1.** Most frequent indications for echocardiography

**eTable 2.** Demographic, echocardiographic, and laboratory differences between patients with normal, mild ePH, and ePH by TRV

**eTable 3.** Adjusted risk of mortality according to RVSP and TRV extracted from Figure 4A and eFigure 3A in the Supplement

**eTable 4.** Adjusted risk of mortality according to RVSP and TRV stratified by sex extracted from Figure 4B and eFigure 3B in the Supplement

**eFigure 1.** Frequency distribution of RVSP and TRV values reported

**eFigure 2.** Whisker plots of RV function by TAPSE and RV-PA coupling by TAPSE/RVSP ratio stratified by degree of PH by TRV

**eFigure 3.** Relationship between TAPSE and RVSP

**eFigure 4.** Adjusted risk of Mortality by TRV and stratified by sex

### **eReferences.**

This supplementary material has been provided by the authors to give readers additional information about their work.

## **eMethods.**

### *Supplemental Description of Clinical Data and Comorbidity Phenotyping*

The demographic, comorbidity, and laboratory data collected were the values closest to the date of the echocardiogram. Comorbidities were defined based on a combination of International Classification of Diseases-9 (ICD9) coding, previously validated algorithms, and laboratory data as described previously (**Supplemental Table**).<sup>1-9</sup> Clinical heart failure was defined by a combination of 1 more ICD9 codes (425.\*, 428.\*) with 1 or more elevated BNP (>100) and 1 or more loop diuretic. Heart failure with reduced ejection fraction (HFrEF) was defined as heart failure plus a LV ejection fraction (EF) <50% and heart failure with preserved ejection fraction (HFpEF) as heart failure plus a LVEF  $\geq$ 50%. Left sided valvular disease was defined as moderate or greater severity of aortic insufficiency, aortic stenosis, and mitral insufficiency or any degree of mitral stenosis. Race was determined by administrative records collected during routine clinical care. Both inpatients and outpatients were included in this study.

### *Supplemental Description of Echocardiographic Data*

We excluded patients with values that were non-physiologic or suggestive of data entry errors based on accepted thresholds for RVSP (<8mmHg or >159mmHg) and TRV (<0.8 or >6.2m/s).<sup>10</sup> Reported echocardiographic data were extracted for left atrial size, left ventricular (LV) end diastolic diameter, LV ejection fraction, and interventricular septal diameter for secondary analyses. Beginning in 2010 left atrial volume index was reported as a standard measure of left atrial size with left atrial diameter used prior to that time. LV diastolic dysfunction was reported by grade (e.g. 1-3) as interpreted by the expert interpreter and indicated in the clinical report. RV size and function were assessed both qualitatively (i.e. normal, mild, moderate, severe)<sup>11</sup> and quantitatively by RV end diastolic diameter and the tricuspid annular plane systolic excursion (TAPSE).<sup>12</sup> Qualitative RV function was as interpreted by expert

readers in clinical practice incorporating qualitative measures and visual recognition.<sup>13,14</sup> Our echocardiography laboratory did not routinely report quantitative measures of RV function measures prior to 2009. Starting in 2009, the most routinely collected metric of RV function was the tricuspid annular plane systolic excursion (TAPSE).

### *Supplemental Description of Outcomes*

If no death was recorded in the Social Security Death Index at the time our analysis was conducted (February 1, 2017) these patients were considered to be alive. Survivors were censored using the date of their last contact with Vanderbilt's medical system (i.e. clinic visit, discharge, prescription fill, etc.) as previously described.<sup>6,8,9,15</sup> This censoring method is conservative because it assumes the no subjects have died between the last contact with Vanderbilt.

### *Supplemental Description of Statistical Analysis*

Time cohorts were defined by 3 to 5-year increments: 1997-1999, 2000-2004, 2005-2009, and 2010-2014 to adjust for any effect of time period of clinical care. We elected to adjust for a clinical diagnosis of heart failure as opposed to by LVEF because normal LVEF values do not capture risk related to HFpEF. Left atrial dilation was defined as a left atrial anterior-posterior diameter greater than 4cm.<sup>16,17</sup> We examined the association between mortality and mild echocardiographic PH (ePH) among a subgroup of patients with established PH risk factors (heart failure, COPD, obstructive sleep apnea, and systemic sclerosis). Associations with race and sex were also examined. We also examined potential interactions between RVSP or TRV and sex and race in Cox regression models. We analyzed RVSP and TRV separately given the subjectivity in estimating RAP to calculate RVSP.

**Supplemental Table. Comorbidity identifiers**

| Comorbidity                           | ICD-9 Code                              | Other Variables                                                                                                                                                                                                                                                                                                                                                                                                                                                                                                                                                                                                                                                                                                                                                                                   |
|---------------------------------------|-----------------------------------------|---------------------------------------------------------------------------------------------------------------------------------------------------------------------------------------------------------------------------------------------------------------------------------------------------------------------------------------------------------------------------------------------------------------------------------------------------------------------------------------------------------------------------------------------------------------------------------------------------------------------------------------------------------------------------------------------------------------------------------------------------------------------------------------------------|
| Heart Failure                         | 425.* , 428.*                           | AND<br>1 or more BNP>100<br>AND<br>1 or more loop diuretic (furosemide, bumetanide, torsemide, ethacrynic acid or metolazone)                                                                                                                                                                                                                                                                                                                                                                                                                                                                                                                                                                                                                                                                     |
| Hypertension                          | 401.* – 405.*                           | 1 or more Problem List: "hypertension", "htn" AND<br>0 in the Problem List: "portal hypertension", "pulmonary hypertension", "rv hypertension", "intracranial hypertension", "phtn"                                                                                                                                                                                                                                                                                                                                                                                                                                                                                                                                                                                                               |
| Chronic Obstructive Pulmonary Disease | 2 or more 491.* , 492.* , 496           | AND 1 or more meds: "roflumilast", "daliresp", "tiotropium", "spiriva", "ipratropium", "atrovent", "theophylline", "slo-bid", "slo-phyllin", "theo-dur", "theo 24", "theo24", "theo-24", "uniphyll", "salmeterol", "serevent", "formoterol", "foradil", "albuterol + ipratropium", "albuterol / ipratropium", "ipratropium bromide / albuterol sulfate", "ipratropium bromide with albuterol sulfate", "combivent", "duoneb", "albuterol", "proventil", "proair", "ventolin", "fluticasone", "salmeterol", "advair", "budesonide/formoterol", "budesonide / formoterol", "budesonide - formoterol", "budesonide-formoterol", "mometasone/formoterol", "mometasone / formoterol", "dulera", "beclomethasone", "qvar", "budesonide", "pulmicort", "fluticasone", "flovent", "mometasone", "asmanex" |
| Interstitial Lung Disease             | 515, 516.3* , 516.4, 516.5              |                                                                                                                                                                                                                                                                                                                                                                                                                                                                                                                                                                                                                                                                                                                                                                                                   |
| Coronary Artery Disease               | 410.*-414.* , V45.82                    | OR CPT codes: 33534-33536, 33510-33523, 92980-92982, 92984, 92995-92996                                                                                                                                                                                                                                                                                                                                                                                                                                                                                                                                                                                                                                                                                                                           |
| Atrial Fibrillation                   | 427.3*                                  | 4 or more of the following:<br>"afib", "a fib", "atrial-fib", "atrial fib", "a flutter", "atrial flutter", "atrial-flutter" in the Problem List or clinical documents (non-negated, non-family)                                                                                                                                                                                                                                                                                                                                                                                                                                                                                                                                                                                                   |
| Sleep Apnea                           | 327.20-327.23<br>780.51, 780.53, 780.57 |                                                                                                                                                                                                                                                                                                                                                                                                                                                                                                                                                                                                                                                                                                                                                                                                   |
| Diabetes Mellitus                     | 250.*                                   | AND "diabetes" or "dm" in the problem list                                                                                                                                                                                                                                                                                                                                                                                                                                                                                                                                                                                                                                                                                                                                                        |
| Connective Tissue Disease             | 710.0-710.1, 517.2, 695.4               |                                                                                                                                                                                                                                                                                                                                                                                                                                                                                                                                                                                                                                                                                                                                                                                                   |
| Systemic Lupus Erythematosus          | 710.0, 695.4                            |                                                                                                                                                                                                                                                                                                                                                                                                                                                                                                                                                                                                                                                                                                                                                                                                   |
| Systemic Sclerosis                    | 710.1* , 517.2*                         |                                                                                                                                                                                                                                                                                                                                                                                                                                                                                                                                                                                                                                                                                                                                                                                                   |
| Left Sided Valve Disease              |                                         | 1 or more echo with moderate or greater:<br>Aortic stenosis, Aortic Insufficiency, Mitral Regurgitation or any Mitral Stenosis                                                                                                                                                                                                                                                                                                                                                                                                                                                                                                                                                                                                                                                                    |

ICD, International Classification of Diseases-9; CPT, Current Procedures Terminology; BNP, brain natriuretic peptide.

**eTable 1.** Most frequent indications for echocardiography

| <b>Indication</b>                                | <b>Count (%)</b> |
|--------------------------------------------------|------------------|
| Coronary Artery Disease or Myocardial Infarction | 3337 (13)        |
| Dyspnea                                          | 3346 (13)        |
| Arrhythmia                                       | 3046 (12)        |
| Heart Failure, unspecified                       | 2535 (10)        |
| Aortic Regurgitation or Stenosis                 | 1920 (7)         |
| Murmur, unspecified                              | 1205 (5)         |
| Mitral Regurgitation or Stenosis                 | 1010 (4)         |
| Hypertension                                     | 974 (4)          |
| Syncope or Dizziness                             | 955 (4)          |
| Screening for Cardiovascular Disease             | 948 (4)          |

**eTable 2.** Demographic, echocardiographic, and laboratory differences between patients with normal, mild ePH, and ePH by TRV

| Variable                                     | TRV (m/sec)       |                        |                 |
|----------------------------------------------|-------------------|------------------------|-----------------|
|                                              | ≤2.5<br>(n=25891) | 2.6-2.9<br>(n=10583)   | ≥3<br>(n=11070) |
| Deceased (%)                                 | 1127 (4)          | 836 (8) <sup>a</sup>   | 1517 (14)       |
| Age, Mean ± SD                               | 55 ±18            | 63 ± 16 <sup>a</sup>   | 66 ± 16         |
| Gender                                       |                   |                        |                 |
| Male (%)                                     | 11270 (44)        | 4713 (45)              | 4920 (44)       |
| Female (%)                                   | 14612 (56)        | 5869 (55)              | 6147 (56)       |
| Race <sup>a</sup>                            |                   |                        |                 |
| Caucasian                                    | 20398 (84)        | 8412 (85)              | 8403 (81)       |
| Black                                        | 2986 (12)         | 1282 (13)              | 1753 (17)       |
| Other                                        | 849 (4)           | 260 (3)                | 210 (3)         |
| BMI, kg/m <sup>2</sup>                       | 28.6 ±7           | 29.2 ±7.5 <sup>a</sup> | 28.8 ±7.9       |
| RVSP, mmHg                                   | 26 ±5             | 36 ± 4 <sup>a</sup>    | 55 ± 16         |
| TRV, m/sec                                   | 2.2 ± 0.3         | 2.7 ±0.1 <sup>a</sup>  | 3.4 ± 0.5       |
| <b>Comorbidities</b>                         |                   |                        |                 |
| Hypertension                                 | 17620 (69)        | 8187 (78) <sup>a</sup> | 8644 (80)       |
| COPD                                         | 2699 (10)         | 1674 (16) <sup>a</sup> | 2399 (22)       |
| CAD                                          | 9185 (35)         | 4896 (46) <sup>a</sup> | 5733 (52)       |
| Atrial Fibrillation                          | 5771 (22)         | 3377 (32) <sup>a</sup> | 4382 (40)       |
| Sleep Apnea                                  | 3101 (12)         | 1366 (13) <sup>a</sup> | 1384 (13)       |
| Heart Failure                                | 3614 (14)         | 2599 (25) <sup>a</sup> | 4125 (37)       |
| LVEF <40% <sup>a</sup>                       | 1003 (29)         | 792 (31)               | 1278 (32)       |
| LVEF 40-50%                                  | 497 (14)          | 404 (16)               | 570 (14)        |
| LVEF >50%                                    | 2000 (57)         | 1319 (52)              | 2116 (53)       |
| HFrEF                                        | 1370 (5)          | 1084 (10) <sup>a</sup> | 1705 (16)       |
| HFpEF                                        | 522 (2)           | 337 (3) <sup>a</sup>   | 561 (5)         |
| Left Sided Valvular Disease                  | 2196 (9)          | 1631(16) <sup>a</sup>  | 2896 (28)       |
| Diabetes Mellitus                            | 8250 (32)         | 3905 (37) <sup>a</sup> | 4424 (40)       |
| Systemic Sclerosis                           | 152 (1)           | 90 (1) <sup>a</sup>    | 200 (2)         |
| <b>Echocardiographic Parameters</b>          |                   |                        |                 |
| LVEF, %                                      | 55 ± 9            | 53 ± 12 <sup>a</sup>   | 50 ± 15         |
| Mitral Inflow E/a Ratio                      | 1.2 ± 0.7         | 1.2 ±0.6               | 1.4 ± 0.8       |
| Left Atrial Diameter, mm                     | 37 ± 7            | 40 ± 8 <sup>a</sup>    | 43 ± 9          |
| Left Atrial Volume Index, mL/m <sup>2</sup>  | 25 ± 10           | 33 ± 21 <sup>a</sup>   | 39 ± 16         |
| Interventricular Septal Diameter, mm         | 12 ± 8            | 13 ± 8 <sup>a</sup>    | 13 ± 8          |
| Left Ventricular Posterior Wall Diameter, mm | 10 ± 2            | 10 ± 2 <sup>a</sup>    | 11 ± 2          |
| RV End Diastolic Diameter, cm                | 2.9 ± 0.8         | 3.0 ± 0.6 <sup>a</sup> | 3.2 ± 0.7       |
| TAPSE, cm                                    | 2.1 ± 0.5         | 2.1 ± 0.6 <sup>a</sup> | 1.8 ± 0.6       |
| Diastolic Dysfunction <sup>a</sup> (n=8728)  |                   |                        |                 |

| Variable                                            | TRV (m/sec)       |                          |                 |
|-----------------------------------------------------|-------------------|--------------------------|-----------------|
|                                                     | ≤2.5<br>(n=25891) | 2.6-2.9<br>(n=10583)     | ≥3<br>(n=11070) |
| Grade 1                                             | 3863 (86)         | 1474 (72)                | 1107 (52)       |
| Grade 2                                             | 532 (12)          | 407 (20)                 | 574 (27)        |
| Grade 3                                             | 101 (2)           | 156 (8)                  | 446 (21)        |
| RV size, qualitative <sup>a</sup><br>(n=26848)      |                   |                          |                 |
| Normal                                              | 14221 (94)        | 5424 (90)                | 4171 (75)       |
| Mildly Dilated                                      | 731 (5)           | 481 (8)                  | 896 (16)        |
| Moderately Dilated                                  | 137 (1)           | 110 (2)                  | 386 (7)         |
| Severely Dilated                                    | 21 (<1)           | 17 (<1)                  | 117 (2)         |
| RV function, qualitative <sup>a</sup><br>(n= 26538) |                   |                          |                 |
| Normal                                              | 14386 (96)        | 5499 (93)                | 4380 (80)       |
| Mildly reduced                                      | 337 (2)           | 244 (4)                  | 553 (10)        |
| Moderately reduced                                  | 196 (1)           | 149 (3)                  | 407 (7)         |
| Severely reduced                                    | 46 (<1)           | 47 (1)                   | 160 (3)         |
| <b>Laboratory Values</b>                            |                   |                          |                 |
| BNP, pg/mL<br>(n=15082)                             | 148 (51-435)      | 240 (85-635)             | 374 (150-919)   |
| Creatinine, mg/dL<br>(n=40846)                      | 1.1 ± 1.1         | 1.3 ± 1.3 <sup>a</sup>   | 1.5 ± 1.6       |
| CRP, mg/L<br>(n=10352)                              | 8.6 (2-55)        | 17 (3.4-88) <sup>a</sup> | 21 (5-99)       |
| eGFR, mL/min/1.73L <sup>2</sup><br>(n=40784)        | 83 ± 39           | 75 ± 37 <sup>a</sup>     | 68 ± 39         |
| Hemoglobin A1c, %<br>(n=18148)                      | 6.2 ± 1.5         | 6.3 ± 1.4 <sup>a</sup>   | 6.4 ± 1.5       |
| HDL, mg/dL<br>(n=24542)                             | 50 ± 18           | 48 ± 18 <sup>a</sup>     | 45 ± 18         |
| LDL, mg/dL<br>(n=23988)                             | 100 ± 37          | 96 ± 39 <sup>a</sup>     | 90 ± 38         |
| Triglycerides, mg/dL=<br>(n=25366)                  | 144 ± 124         | 145 ± 112                | 143 ± 114       |
| Hemoglobin, g/dL<br>(n=40002)                       | 12.7 ± 2          | 12.1 ± 2 <sup>a</sup>    | 11.7 ± 2        |
| <b>Medications</b>                                  |                   |                          |                 |
| Beta Blocker                                        | 15811 (61)        | 7533 (71) <sup>a</sup>   | 7982 (72)       |
| ACE Inhibitor                                       | 12390 (48)        | 5997 (57) <sup>a</sup>   | 6491 (59)       |
| Calcium Channel<br>Blocker                          | 11708 (45)        | 5715 (54) <sup>a</sup>   | 6076 (55)       |
| ARB                                                 | 6868 (27)         | 3192 (30) <sup>a</sup>   | 3131 (28)       |
| Loop Diuretic                                       | 9718 (38)         | 4616 (44) <sup>a</sup>   | 4851 (44)       |
| Non-Loop Diuretic                                   | 12042 (47)        | 6544 (62) <sup>a</sup>   | 8206 (74)       |

| Variable                      | TRV (m/sec)       |                        |                 |
|-------------------------------|-------------------|------------------------|-----------------|
|                               | ≤2.5<br>(n=25891) | 2.6-2.9<br>(n=10583)   | ≥3<br>(n=11070) |
| Mineralocorticoid Antagonist  | 3735 (14)         | 2082 (20) <sup>a</sup> | 2769 (25)       |
| Alpha Blocker                 | 1225 (5)          | 641 (6) <sup>a</sup>   | 661 (6)         |
| Alpha-2 Agonist               | 3552 (14)         | 1782 (17) <sup>a</sup> | 1967 (18)       |
| Nitrates                      | 8048 (31)         | 4034 (38) <sup>a</sup> | 4781 (43)       |
| Statins                       | 13215 (51)        | 6180 (58) <sup>a</sup> | 5999 (54)       |
| Nicotinic Acid                | 1209 (5)          | 531 (5) <sup>a</sup>   | 430 (4)         |
| Fibrates                      | 5594 (22)         | 2804 (26) <sup>a</sup> | 2870 (26)       |
| Oral Anticoagulant            | 7153 (28)         | 3799 (36) <sup>a</sup> | 4947 (45)       |
| Subcutaneous Anticoagulant    | 5722 (22)         | 2907 (27) <sup>a</sup> | 3344 (30)       |
| Any PAH Medication            | 11591 (45)        | 5659 (53) <sup>a</sup> | 6311 (57)       |
| PAH CCB                       | 11232 (43)        | 5504 (52) <sup>a</sup> | 5863 (53)       |
| Prostacyclin                  | 372 (1)           | 246 (2) <sup>a</sup>   | 775 (7)         |
| Endothelin Receptor Blocker   | 48 (0)            | 35 (0) <sup>a</sup>    | 327 (3)         |
| Phosphodiesterase-5 Inhibitor | 730 (3)           | 348 (3)                | 701 (6)         |
| Guanylate Cyclase Stimulator  | 1 (0)             | 0 (0)                  | 5 (0)           |
| Metformin                     | 4072 (16)         | 1805 (17) <sup>a</sup> | 1707 (15)       |
| Insulin                       | 8748 (34)         | 4562 (43) <sup>a</sup> | 5270 (48)       |
| Sulfonylurea                  | 2499 (10)         | 1287 (12) <sup>a</sup> | 1459 (13)       |
| Thiazolidinedione             | 1033 (4)          | 577 (5) <sup>a</sup>   | 630 (6)         |

Continuous variables are presented as mean ± standard deviation with the exception of BNP and CRP which are presented as median (25<sup>th</sup>- 75<sup>th</sup> percentile). <sup>a</sup> p<0.05 comparing TRV of ≤2.6 versus 2.6-2.9m/sec. BMI, body mass index; RVSP, right ventricular systolic pressure; TRV, tricuspid regurgitant velocity; COPD, chronic obstruction pulmonary disease; CAD, coronary artery disease; EF, ejection fraction; HFrEF, Heart Failure with reduced ejection fraction; HFpEF: Heart Failure with preserved ejection fraction; RV, right ventricular; TAPSE, tricuspid annular plane systolic excursion; BNP, brain natriuretic peptide; CRP, C-reactive protein; eGFR, estimated glomerular filtration rate; HDL, high-density lipoprotein; LDL, low-density lipoprotein, ACE, angiotensin converting enzyme; CCB, calcium channel blocker; ARB, Angiotensin receptor blocker; PAH, pulmonary arterial hypertension.



**eTable 3.** Adjusted risk of mortality according to RVSP and TRV extracted from Figure 4A and eFigure 3A in the Supplement

| RVSP (mmHg) | Hazard Ratio (CI)    | TRV (m/sec) | Hazard Ratio (CI)    |
|-------------|----------------------|-------------|----------------------|
| 25          | 1.23<br>(0.98- 1.54) | 2.4         | 1.25<br>(1.12- 1.40) |
| 30          | 1.53<br>(1.16- 2.01) | 2.6         | 1.62<br>(1.44- 1.83) |
| 35          | 2.08<br>(1.59- 2.72) | 2.8         | 2.08<br>(1.83- 2.37) |
| 40          | 2.71<br>(2.09- 3.51) | 3           | 2.51<br>(2.19- 2.88) |
| 45          | 3.28<br>(2.54- 4.23) | 3.2         | 2.88<br>(2.50- 3.31) |
| 50          | 3.74<br>(2.91- 4.82) | 3.4         | 3.18<br>(2.77- 3.66) |
| 55          | 4.10<br>(3.18-5.28)  | 3.6         | 3.46<br>(3.01- 3.98) |
| 60          | 4.37<br>(3.39- 5.63) | 3.8         | 3.74<br>(3.24- 4.32) |

The reference values were a RVSP of 15mmHg and TRV of 1.9m/sec. RVSP, right ventricular systolic pressure; TRV, tricuspid regurgitant velocity; CI, confidence interval. Adjusted for the following potential confounders *a priori* based on clinical knowledge: age, race, sex, body mass index, hypertension, heart failure with reduced ejection fraction, heart failure with preserved ejection fraction, left sided valve disease, left atrial dilation, interstitial lung disease, chronic obstructive pulmonary disease, connective tissue disease, coronary disease, atrial fibrillation, sleep apnea, diabetes and by cohorts of time in which echo was performed

**eTable 4.** Adjusted risk of mortality according to RVSP and TRV stratified by sex extracted from Figure 4B and eFigure 3B in the Supplement

| RVSP (mmHg) | Hazard Ratio (CI)    |                      | TRV (m/sec) | Hazard Ratio (CI)    |                      |
|-------------|----------------------|----------------------|-------------|----------------------|----------------------|
|             | Male                 | Female               |             | Male                 | Female               |
| <b>25</b>   | 1.16<br>(0.92- 1.46) | 1.29<br>(1.03- 1.62) | 2.4         | 1.19<br>(1.06- 1.34) | 1.35<br>(1.20- 1.52) |
| <b>30</b>   | 1.41<br>(1.07- 1.86) | 1.66<br>(1.25- 2.19) | 2.6         | 1.52<br>(1.34- 1.71) | 1.81<br>(1.58- 2.06) |
| <b>35</b>   | 1.89<br>(1.44-2.47)  | 2.34<br>(1.78- 3.07) | 2.8         | 1.91<br>(1.66- 2.18) | 2.39<br>(2.06- 2.77) |
| <b>40</b>   | 2.41<br>(1.85- 3.13) | 3.15<br>(2.41- 4.11) | 3           | 2.24<br>(1.93- 2.60) | 2.95<br>(2.51- 3.47) |
| <b>45</b>   | 2.84<br>(2.19- 3.69) | 3.92<br>(3.00- 5.12) | 3.2         | 2.49<br>(2.13- 2.92) | 3.45<br>(2.91- 4.09) |
| <b>50</b>   | 3.15<br>(2.42- 4.10) | 4.58<br>(3.50- 5.99) | 3.4         | 2.68<br>(2.27- 3.15) | 3.90<br>(3.27- 4.64) |
| <b>55</b>   | 3.33<br>(2.55- 4.36) | 5.11<br>(3.90- 6.72) | 3.6         | 2.82<br>(2.37- 3.35) | 4.31<br>(3.60- 5.17) |
| <b>60</b>   | 3.43<br>(2.61- 4.53) | 5.56<br>(4.22- 7.33) | 3.8         | 2.95<br>(2.45- 3.56) | 4.75<br>(3.93- 5.75) |

The reference values were a RVSP of 15mmHg and TRV of 1.9m/sec. RVSP, right ventricular systolic pressure; TRV, tricuspid regurgitant velocity; CI, confidence interval. Adjusted for the following potential confounders *a priori* based on clinical knowledge: age, race, sex, body mass index, hypertension, heart failure with reduced ejection fraction, heart failure with preserved ejection fraction, left sided valve disease, left atrial dilation, interstitial lung disease, chronic obstructive pulmonary disease, connective tissue disease, coronary disease, atrial fibrillation, sleep apnea, diabetes and by cohorts of time in which echo was performed

### eFigure 1. Frequency distribution of RVSP and TRV values reported

RVSP and TRV values in the Mild ePH range are frequent. RVSP, right ventricular systolic pressure; TRV, tricuspid regurgitant velocity; PH, pulmonary hypertension.

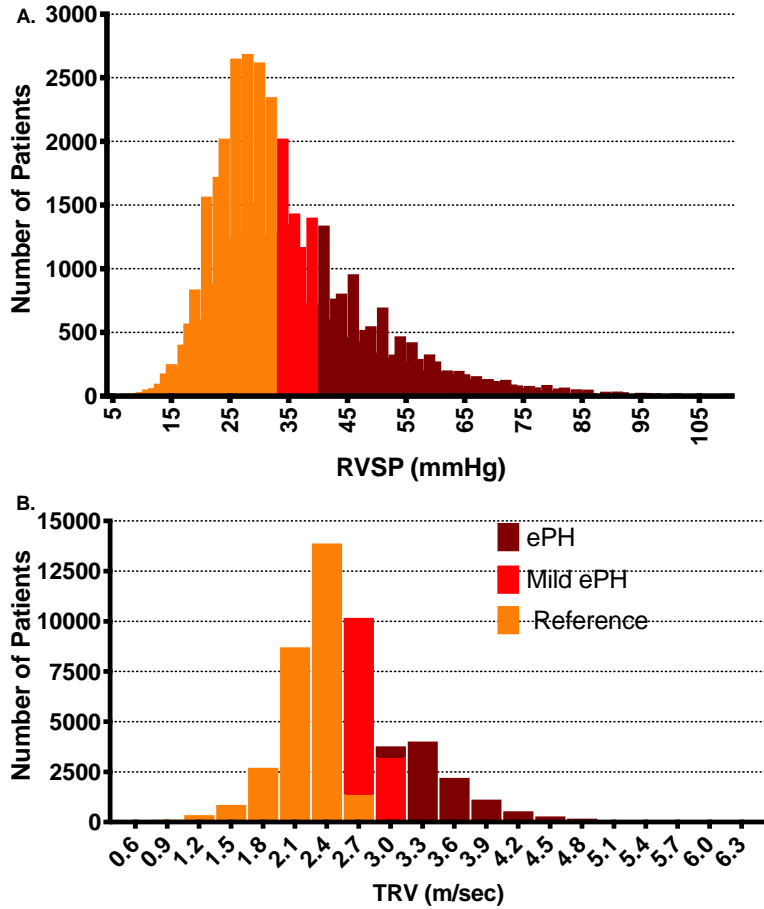

**eFigure 2.** Whisker plots of RV function by TAPSE and RV-PA coupling by TAPSE/RVSP ratio stratified by degree of PH by TRV

**A.** RV Function by TAPSE is significantly lower in patients with Mild ePH and ePH as compared with the reference. **B.** RV-PA coupling by TAPSE/TRV ratio worsens with increasing degrees of ePH. \*Four values are outside the range in the reference group and are not included TRV, tricuspid regurgitant velocity; RV, right ventricular; PA, pulmonary arterial; TAPSE, tricuspid annular systolic excursion; ePH, echocardiographic pulmonary hypertension.

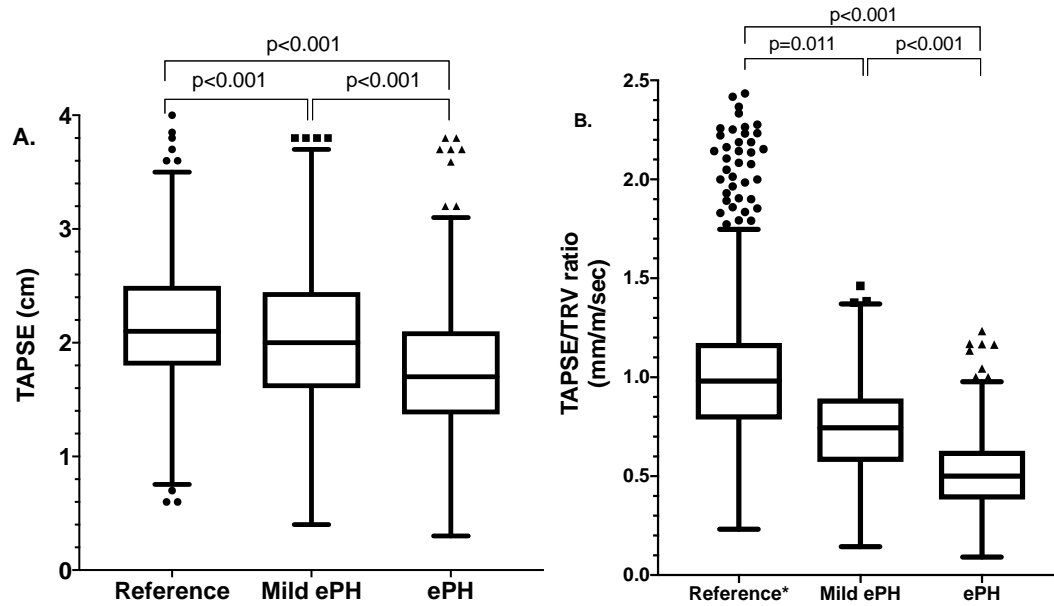

**eFigure 3.** Relationship between TAPSE and RVSP

There was a significant non-linear, inverse relationship between TAPSE and RVSP ( $p < 0.01$ ).

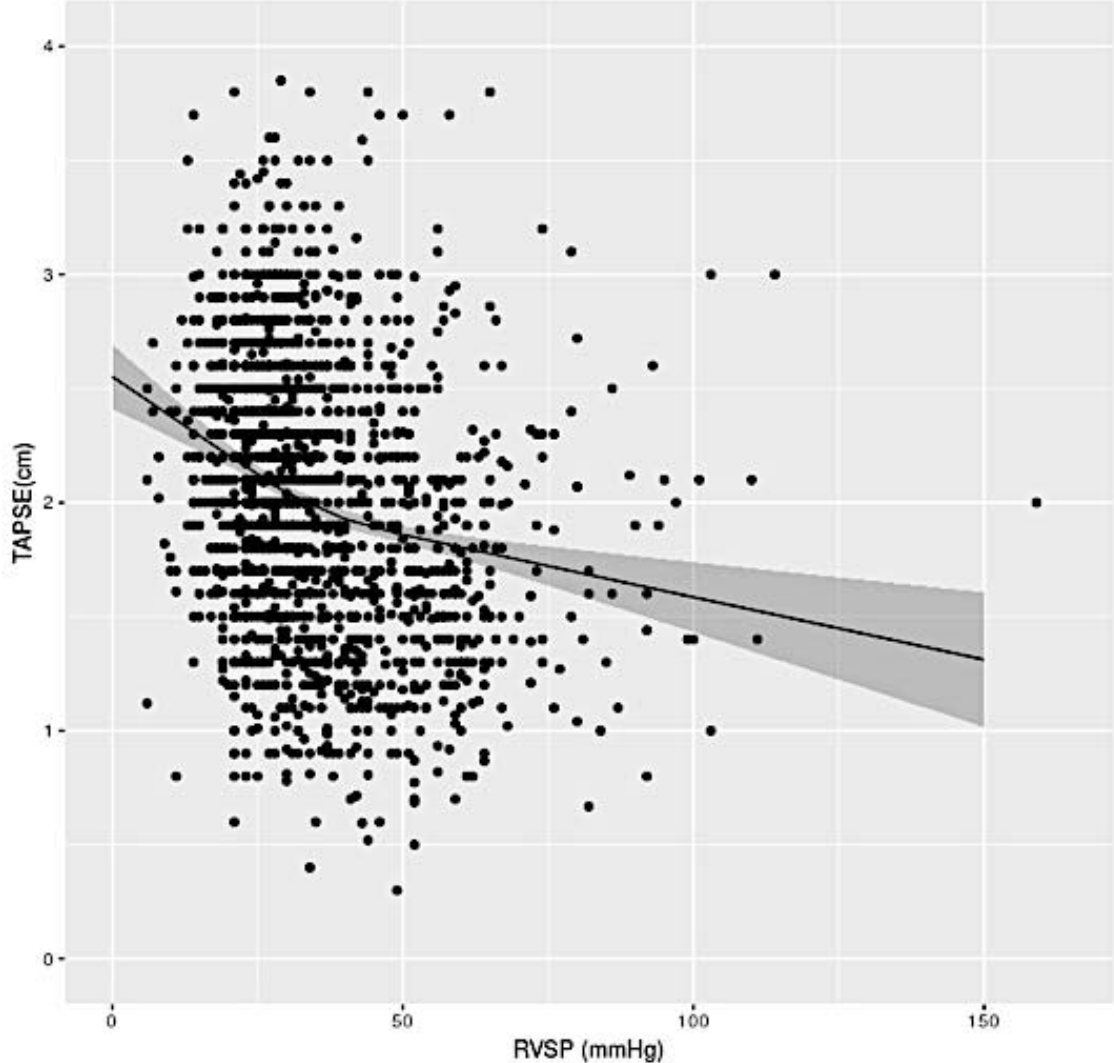

**eFigure 4. Adjusted risk of Mortality by TRV and stratified by sex**

**A.** Mortality increased significantly as TRV increased. **B.** Women had a higher risk of mortality compared to men at a given TRV (p for interaction <0.001). Reference value was a TRV of 1.9m/sec. See eTables 2 and 3 for Hazard Ratios. TRV, tricuspid regurgitant velocity. Adjusted for the following potential confounders *a priori* based on clinical knowledge: age, race, sex, body mass index, hypertension, heart failure with reduced ejection fraction, heart failure with preserved ejection fraction, left sided valve disease, left atrial dilation, interstitial lung disease, chronic obstructive pulmonary disease, connective tissue disease, coronary disease, atrial fibrillation, sleep apnea, diabetes and by cohorts of time in which echo was performed

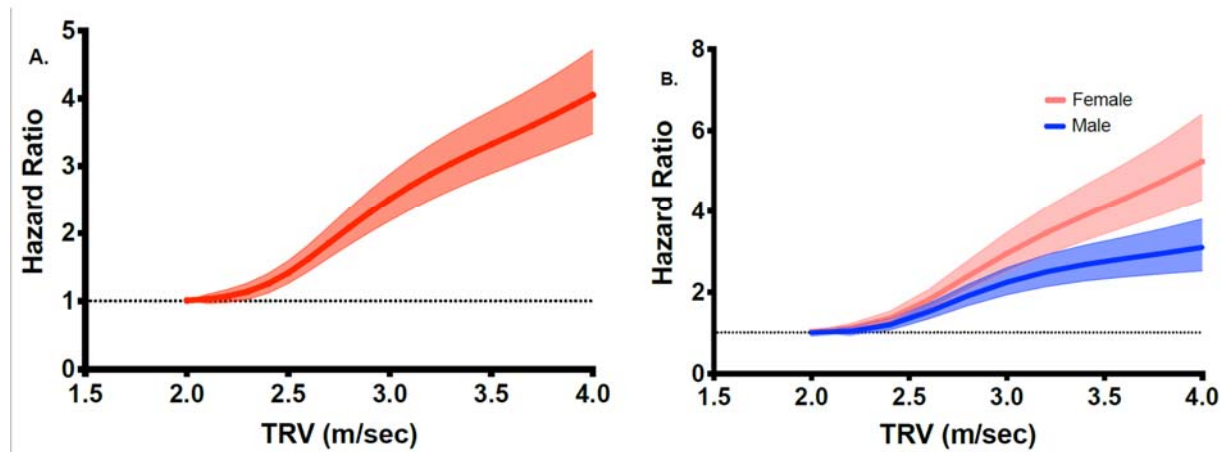

## eReferences.

1. Douschan P, Kovacs G, Avian A, et al. Mild Elevation of Pulmonary Arterial Pressure as a Predictor of Mortality. *Am J Respir Crit Care Med*. 2018;197(4):509-516.
2. York MK, Gupta DK, Reynolds CF, et al. B-Type Natriuretic Peptide Levels and Mortality in Patients With and Without Heart Failure. *J Am Coll Cardiol*. 2018;71(19):2079-2088.
3. Patel DK, Green KD, Fudim M, Harrell FE, Wang TJ, Robbins MA. Racial differences in the prevalence of severe aortic stenosis. *J Am Heart Assoc*. 2014;3(3):e000879.
4. Assad TR, Maron BA, Robbins IM, et al. Prognostic Effect and Longitudinal Hemodynamic Assessment of Borderline Pulmonary Hypertension. *JAMA Cardiol*. 2017;2(12):1361-1368.
5. Assad TR, Brittain EL, Wells QS, et al. Hemodynamic evidence of vascular remodeling in combined post- and precapillary pulmonary hypertension. *Pulm Circ*. 2016;6(3):313-321.
6. Assad TR, Hemnes AR, Larkin EK, et al. Clinical and Biological Insights Into Combined Post- and Pre-Capillary Pulmonary Hypertension. *J Am Coll Cardiol*. 2016;68(23):2525-2536.
7. Gottesman O, Kuivaniemi H, Tromp G, et al. The Electronic Medical Records and Genomics (eMERGE) Network: past, present, and future. *Genet Med*. 2013;15(10):761-771.
8. O'Leary JM, Assad TR, Xu M, et al. Lack of a Tricuspid Regurgitation Doppler Signal and Pulmonary Hypertension by Invasive Measurement. *J Am Heart Assoc*. 2018;7(13).
9. O'Leary JM, Assad TR, Xu M, et al. Pulmonary hypertension in patients with chronic kidney disease: invasive hemodynamic etiology and outcomes. *Pulm Circ*. 2017;7(3):674-683.
10. Robbins IM, Hemnes AR, Pugh ME, et al. High prevalence of occult pulmonary venous hypertension revealed by fluid challenge in pulmonary hypertension. *Circ Heart Fail*. 2014;7(1):116-122.
11. Mohammed SF, Hussain I, Abou Ezzeddine OF, et al. Right Ventricular Function in Heart Failure with Preserved Ejection Fraction: A Community Based Study. *Circulation*. 2014.
12. Lang RM, Badano LP, Mor-Avi V, et al. Recommendations for cardiac chamber quantification by echocardiography in adults: an update from the American Society of Echocardiography and the European Association of Cardiovascular Imaging. *J Am Soc Echocardiogr*. 2015;28(1):1-39 e14.
13. Rudski LG, Lai WW, Afilalo J, et al. Guidelines for the echocardiographic assessment of the right heart in adults: a report from the American Society of Echocardiography endorsed by the European Association of Echocardiography, a registered branch of the European Society of Cardiology, and the Canadian Society of Echocardiography. *J Am Soc Echocardiogr*. 2010;23(7):685-713; quiz 786-688.
14. Valsangiacomo Buechel ER, Mertens LL. Imaging the right heart: the use of integrated multimodality imaging. *Eur Heart J*. 2012;33(8):949-960.
15. Assad TR, Maron BA, Robbins IM, et al. Prognostic Effect and Longitudinal Hemodynamic Assessment of Borderline Pulmonary Hypertension. *JAMA Cardiol*. 2017.

16. Thenappan T, Shah SJ, Gomberg-Maitland M, et al. Clinical characteristics of pulmonary hypertension in patients with heart failure and preserved ejection fraction. *Circ Heart Fail.* 2011;4(3):257-265.
17. Hirata T, Wolfe SB, Popp RL, Helmen CH, Feigenbaum H. Estimation of left atrial size using ultrasound. *Am Heart J.* 1969;78(1):43-52.
